# Supplementary material for: Interaction process between gaseous CH3I and NaCl particles: implication for iodine dispersion in the atmosphere
Source: Royal Society of Chemistry journal article supplement (doi:10.1039/d1em00266j), 2021-01-01
Supplement: d1em00266j1.pdf [file d1em00266j1.pdf]

## Interaction process between gaseous CH<sub>3</sub>I and NaCl particles: implication for iodine dispersion in the atmosphere

Hanaa Houjeij<sup>a,b</sup>, Anne-Cécile Gregoire<sup>b\*</sup>, Gwenaëlle Le Bourdon<sup>a</sup>, Laurent Cantrel<sup>b</sup> and Sophie Sobanska<sup>a\*</sup>

<sup>a</sup> Institut des Sciences Moléculaires, Université de Bordeaux, UMR CNRS 5255, 33405 Talence Cedex, France

<sup>b</sup> Institut de Radioprotection et de Sûreté Nucléaire (IRSN), PSN-RES, SEREX, Laboratoire expérimentation environnement et chimie (L2EC) 13115 St Paul Lez Durance, France

\*corresponding authors: [sophie.sobanska@u-bordeaux.fr](mailto:sophie.sobanska@u-bordeaux.fr); [anne-cecile.gregoire@irsn.fr](mailto:anne-cecile.gregoire@irsn.fr)

### Supporting information

#### Tables of Tables

Table S1 Experimental conditions of the series of experiments performed in this study.

Table S2 The calculated loss of adsorbed CH<sub>3</sub>I between exposure phase and static and Ar flow phases (experiment series 2). A is the sum of the area of 1275, 1244, 1220, 1183, 1073 and 1024 cm<sup>-1</sup> bands ( $\Sigma\text{CH}_3\text{I}_{\text{adsorbed}}$ ). A<sub>exp</sub> denotes the area at the end of exposure phase, A<sub>static</sub> denotes the average area of the last 32 minutes in static phase and A<sub>Ar</sub> denotes the area at different temperature in Ar flow phase.

Table S3 Determination of the total amount of iodine taken up by NaCl using ICP-MS technique and determination of conversion factor.

#### Table of Figures

Figure S1 DRIFTS spectra in the 1400-900 cm<sup>-1</sup> IR spectral range of NaCl (in black), NaI (in dark yellow) and KBr (in violet) exposed to 1 hour of CH<sub>3</sub>I (108mL.min<sup>-1</sup>, 1000 ppm) continuous flow at 23°C and 1 atm. Bands in blue are adsorbed CH<sub>3</sub>I and green are gaseous CH<sub>3</sub>I near the surface.

Figure S2 DRIFTS spectra in the deformation (1400-900 cm<sup>-1</sup>) of NaCl as a function of exposure time of the continuous CH<sub>3</sub>I (108mL.min<sup>-1</sup>, 1000 ppm) flow at 23°C and 1 atm. Bands in blue are adsorbed CH<sub>3</sub>I on NaCl and green are gaseous CH<sub>3</sub>I near the surface.

Figure S3 DRIFTS spectra of NaCl after 5 hours of CH<sub>3</sub>I continuous flow, then under static conditions for 1 hour and finally under 1 hour of continuous Ar flow in the spectral range 1400-900 cm<sup>-1</sup>. Bands in blue are CH<sub>3</sub>I adsorbed on NaCl and in green are gaseous CH<sub>3</sub>I near NaCl surface.

Figure S4 DRIFTS spectra of NaCl in the spectral range 1400-900 cm<sup>-1</sup> after 1 hour of CH<sub>3</sub>I continuous flow, then under static conditions for 4 hours and finally under Ar flow at 23 °C for 1 hour, at 100 °C for 15 minutes, 200 °C for 15 minutes and 400 °C for 15 minutes. Bands in blue are CH<sub>3</sub>I adsorbed on NaCl and green are gaseous CH<sub>3</sub>I.

Figure S5 Double log curve of rate of  $\Sigma\text{CH}_3\text{I}_{\text{adsorbed}}$  versus CH<sub>3</sub>I gaseous concentration at 1000, 500 and 200 ppm (experiment series (4)).

#### Theoretical Calculation

The structure of CH<sub>3</sub>I monomer was calculated with the Gaussian16 program using the long range corrected functional  $\omega\text{B97X-D}$  with the aug-cc-pVTZ basis set for hydrogen, carbon and oxygen atoms, while the aug-cc-pVTZ-PP basis set was used for the iodine atom that incorporates a small-core relativistic pseudo potential. More details can be found elsewhere <sup>1</sup>.

**Tables**

**Table S1:** Experimental conditions of the series of experiments performed in this study.

| Salt                  | Exposure phase   |                                        |                                                   |          | Spontaneous desorption phase (Static condition) | Induced desorption phase (Continuous Ar flow of 108 mL.min <sup>-1</sup> ) | Activated desorption phase (Continuous Ar flow of 108 mL.min <sup>-1</sup> ) |                   |                   | Repetition |
|-----------------------|------------------|----------------------------------------|---------------------------------------------------|----------|-------------------------------------------------|----------------------------------------------------------------------------|------------------------------------------------------------------------------|-------------------|-------------------|------------|
|                       | Temperature (°C) | [CH <sub>3</sub> I] <sub>g</sub> (ppm) | CH <sub>3</sub> I/Ar flow (mL.min <sup>-1</sup> ) | Duration | Duration                                        | Duration                                                                   | Duration at 100°C                                                            | Duration at 200°C | Duration at 350°C |            |
| Experiment series (1) |                  |                                        |                                                   |          |                                                 |                                                                            |                                                                              |                   |                   |            |
| NaCl                  | 23               | 1000                                   | 108/0                                             | 5 hours  | 1 hour                                          | 1 hour                                                                     | 0                                                                            | 0                 | 0                 | 3          |
| Experiment series (2) |                  |                                        |                                                   |          |                                                 |                                                                            |                                                                              |                   |                   |            |
| NaCl                  | 23               | 1000                                   | 108/0                                             | 1 hour   | 4 hours                                         | 1 hour                                                                     | 15 min                                                                       | 15 min            | 15 min            | 1          |
| Experiment series (3) |                  |                                        |                                                   |          |                                                 |                                                                            |                                                                              |                   |                   |            |
| NaCl                  | 23               | 500                                    | 54/54                                             | 5 hours  | 0                                               | 0                                                                          | 0                                                                            | 0                 | 0                 | 2          |
| NaCl                  | 23               | 200                                    | 21/87                                             | 5 hours  | 0                                               | 0                                                                          | 0                                                                            | 0                 | 0                 | 1          |
| Experiment series (4) |                  |                                        |                                                   |          |                                                 |                                                                            |                                                                              |                   |                   |            |
| NaI                   | 23               | 1000                                   | 108/0                                             | 1 hours  | 0                                               | 0                                                                          | 0                                                                            | 0                 | 0                 | 1          |
| KBr                   | 23               | 1000                                   | 108/0                                             | 1 hours  | 0                                               | 0                                                                          | 0                                                                            | 0                 | 0                 | 1          |

**Table S2:** The calculated loss of adsorbed CH<sub>3</sub>I between exposure phase and static and Ar flow phases (experiment series 2). A is the sum of the area of 1275, 1244, 1220, 1183, 1073 and 1024 cm<sup>-1</sup> bands ( $\sum \text{CH}_3\text{I}_{\text{adsorbed}}$ ). A<sub>exp</sub> denotes the area at the end of exposure phase, A<sub>static</sub> denotes the average area of the last 32 minutes in static phase and A<sub>Ar</sub> denotes the area at different temperature in Ar flow phase.

| Spectral Region                                | Adsorbed CH <sub>3</sub> I in CH <sub>3</sub> deformation region |
|------------------------------------------------|------------------------------------------------------------------|
| Band area uncertainty                          | 0.37                                                             |
| <b>CH<sub>3</sub>I exposure phase</b>          |                                                                  |
| Duration                                       | 1 hour                                                           |
| A <sub>exp</sub> : after 1 hour                | 0.46 ± 0.37                                                      |
| <b>Spontaneous desorption phase</b>            |                                                                  |
| Duration                                       | 1 hour                                                           |
| A <sub>static</sub> : after 4 hour             | 0.48 ± 0.37                                                      |
| <b>Induced and activated desorption phases</b> |                                                                  |
| Duration                                       | 2 hours                                                          |
| A <sub>Ar</sub> : Area at 23 °C                | 0.42 ± 0.37                                                      |
| A <sub>Ar</sub> : Area at 100 °C               | 0.48 ± 0.37                                                      |
| A <sub>Ar</sub> : Area at 200 °C               | 0.39 ± 0.37                                                      |

**Table S3:** Determination of the total amount of iodine taken up by NaCl using ICP-MS technique and determination of conversion factor.

|                                                                                                                                                                                                                                                   |                             |                             |                             |
|---------------------------------------------------------------------------------------------------------------------------------------------------------------------------------------------------------------------------------------------------|-----------------------------|-----------------------------|-----------------------------|
| Using ICP-MS to determine the total number of iodine taken up by solid NaCl in mg using [E-S1]:                                                                                                                                                   |                             |                             |                             |
| <b><math>m_t(\text{I}) \text{ in the solution} = [\text{I}] \text{ in ppb} \times \text{Volume of NaOH (mL)}</math> [E-S1]</b>                                                                                                                    |                             |                             |                             |
| Then total mass of iodine taken up by dissolved salt in number of atoms /mg was determined by [E-S2]:                                                                                                                                             |                             |                             |                             |
| <b><math>m_t(\text{I}) \text{ in dissolved NaCl} = \frac{m_t(\text{I}) \text{ in the solution (mg)}}{m_{\text{NaCl dissolved}} \text{ (mg)}} \times 10^{-3} \times \frac{\text{Avogadro's number}}{\text{Molar mass of Iodine}}</math> [E-S2]</b> |                             |                             |                             |
| The total amount of iodine taken up <b>total NaCl (number of atoms)</b> is then [E-S3]:                                                                                                                                                           |                             |                             |                             |
| <b><math>m_t(\text{I}) \text{ in total NaCl} = m_t(\text{I}) \text{ in dissolved NaCl (number of atoms /mg)} \times \text{Total } m_{\text{NaCl}} \text{ (mg)}</math> [E-S3]</b>                                                                  |                             |                             |                             |
| Experiment series (1) : NaCl exposed to 1000 ppm CH <sub>3</sub> I for 5 hours                                                                                                                                                                    | Repeat 1                    | Repeat 2                    | Repeat 3                    |
| Mass of NaCl in the reactor (mg)                                                                                                                                                                                                                  | 150.0                       | 144.2                       | 146.2                       |
| Mass of NaCl (mg) dissolved in NaOH after exposure phase                                                                                                                                                                                          | 100.1                       | 100.6                       | 100.3                       |
| Volume of NaOH solution (ml)                                                                                                                                                                                                                      | 10                          | 10                          | 10                          |
| <b>ICP MS results and determination of iodine concentration on NaCl</b>                                                                                                                                                                           |                             |                             |                             |
| Analyse 1 (ppb)                                                                                                                                                                                                                                   | 2.94×10 <sup>2</sup>        | 3.48×10 <sup>2</sup>        | 4.33×10 <sup>2</sup>        |
| Analyse2 (ppb)                                                                                                                                                                                                                                    | 2.92×10 <sup>2</sup>        | 3.52×10 <sup>2</sup>        | 4.46×10 <sup>2</sup>        |
| Analyse 3 (ppb)                                                                                                                                                                                                                                   | 2.80×10 <sup>2</sup>        | 3.42×10 <sup>2</sup>        | 4.25×10 <sup>2</sup>        |
| Average [I] concentration (ppb)                                                                                                                                                                                                                   | 2.88×10 <sup>2</sup>        | 3.47×10 <sup>2</sup>        | 4.34×10 <sup>2</sup>        |
| Total mass of iodine in the NaOH solution (mg)                                                                                                                                                                                                    | 2.88×10 <sup>-3</sup>       | 3.47×10 <sup>-3</sup>       | 4.34×10 <sup>-3</sup>       |
| <b>Mass of iodine taken up (mg/mg of NaCl )</b>                                                                                                                                                                                                   | <b>2.88×10<sup>-5</sup></b> | <b>3.45×10<sup>-5</sup></b> | <b>4.33×10<sup>-5</sup></b> |
| <b>Amount of iodine taken up (number of atoms/mg of NaCl )</b>                                                                                                                                                                                    | <b>1.37×10<sup>14</sup></b> | <b>1.64×10<sup>14</sup></b> | <b>2.05×10<sup>14</sup></b> |
| <b>Mean of amount of iodine taken up by NaCl (number of atoms/mg of NaCl)</b>                                                                                                                                                                     |                             | <b>1.69×10<sup>14</sup></b> |                             |
| <b>Absolute uncertainty interval at 95% confidence level(+/- number of atoms)</b>                                                                                                                                                                 |                             | <b>8.6×10<sup>13</sup></b>  |                             |
| <b>Total iodine mass taken up by the total mass of NaCl</b>                                                                                                                                                                                       |                             |                             |                             |
| <b>Total mass of iodine taken up by <u>total mass</u> of NaCl (mg)</b>                                                                                                                                                                            | <b>4.32×10<sup>-3</sup></b> | <b>4.98×10<sup>-3</sup></b> | <b>6.33×10<sup>-3</sup></b> |
| <b>Total amount of iodine taken up by <u>total mass of</u> NaCl (number of atoms)</b>                                                                                                                                                             | <b>2.05×10<sup>16</sup></b> | <b>2.36×10<sup>16</sup></b> | <b>3.00×10<sup>16</sup></b> |
| <b>Absolute uncertainty interval (+/- number of atoms)</b>                                                                                                                                                                                        | <b>1.64×10<sup>15</sup></b> | <b>1.89×10<sup>15</sup></b> | <b>2.40×10<sup>15</sup></b> |
| <b>Conversion factor of FTIR <math>\Sigma\text{CH}_3\text{I}_{\text{adsorbed}}</math> band area to number of CH<sub>3</sub>I absorbed on NaCl</b>                                                                                                 |                             |                             |                             |
| $\Sigma_{\text{CH}_3\text{I}}$ Band area – pseudo absorbance (a.u.)                                                                                                                                                                               | 2.085                       | 2.069                       | 2.338                       |
| absolute area uncertainty (+/- surface unit of integrated area)                                                                                                                                                                                   | 0.37                        | 0.37                        | 0.37                        |
| Conversion factor (number of I atoms on NaCl/ surface of integrated band)                                                                                                                                                                         | 9.83×10 <sup>15</sup>       | 1.14×10 <sup>16</sup>       | 1.28×10 <sup>16</sup>       |
| Conversion factor absolute uncertainty                                                                                                                                                                                                            | 1.91×10 <sup>15</sup>       | 2.24×10 <sup>15</sup>       | 2.28×10 <sup>15</sup>       |
| Mean conversion factor                                                                                                                                                                                                                            |                             | 1.14×10 <sup>16</sup>       |                             |
| Mean conversion factor uncertainty                                                                                                                                                                                                                |                             | 3.74×10 <sup>15</sup>       |                             |

## Figures

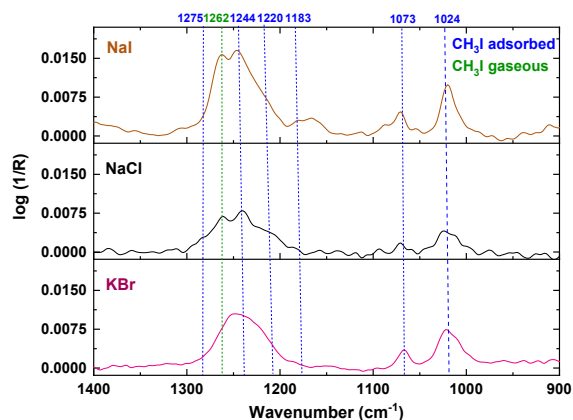

**Figure S1:** DRIFTS spectra in the 1400-900 cm<sup>-1</sup> IR spectral range of NaCl (in black), NaI (in dark yellow) and KBr (in violet) exposed to 1 hour of CH<sub>3</sub>I (108mL.min<sup>-1</sup>, 1000 ppm) continuous flow at 23°C and 1 atm. Bands in blue are adsorbed CH<sub>3</sub>I and green are gaseous CH<sub>3</sub>I near the surface.

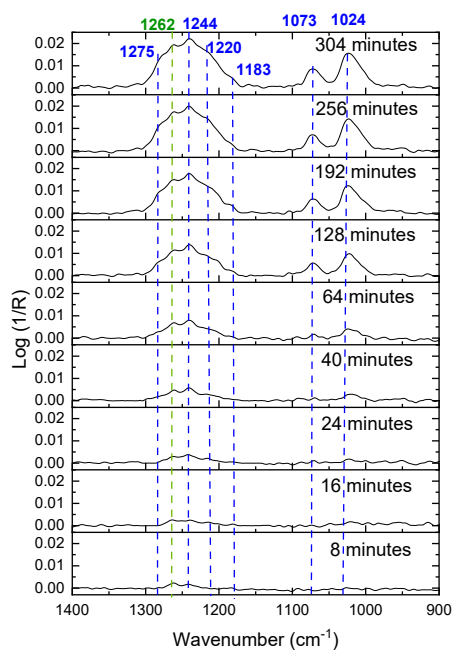

**Figure S2:** DRIFTS spectra in the deformation (1400-900 cm<sup>-1</sup>) of NaCl as a function of exposure time of the continuous CH<sub>3</sub>I (108mL.min<sup>-1</sup>, 1000 ppm) flow at 23°C and 1 atm. Bands in blue are adsorbed CH<sub>3</sub>I on NaCl and green are gaseous CH<sub>3</sub>I near the surface.

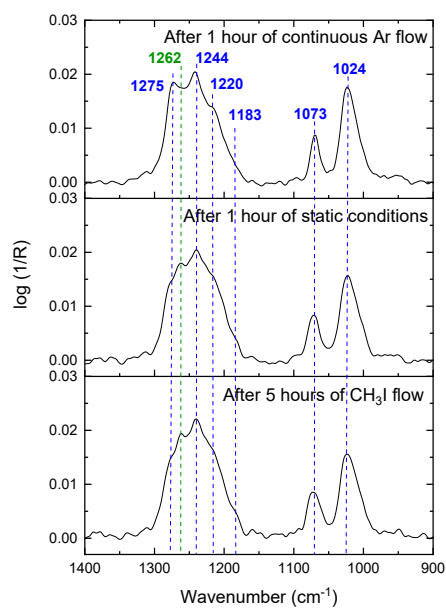

**Figure S3:** DRIFTS spectra of NaCl after 5 hours of CH<sub>3</sub>I continuous flow, then under static conditions for 1 hour and finally under 1 hour of continuous Ar flow in the spectral range 1400-900 cm<sup>-1</sup>. Bands in blue are CH<sub>3</sub>I adsorbed on NaCl and in green are gaseous CH<sub>3</sub>I near NaCl surface.

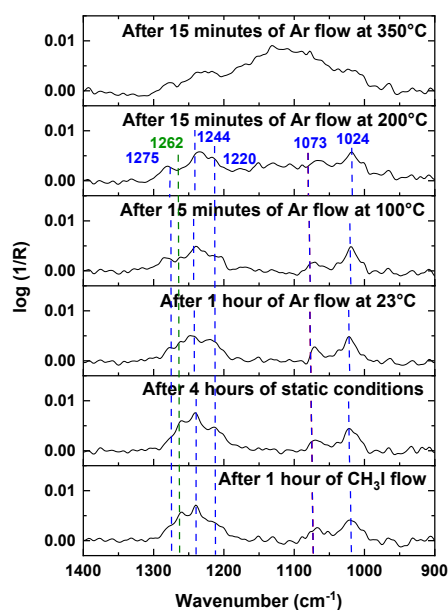

**Figure S4:** DRIFTS spectra of NaCl in the spectral range 1400-900 cm<sup>-1</sup> after 1 hour of CH<sub>3</sub>I continuous flow, then under static conditions for 4 hours and finally under Ar flow at 23 °C for 1 hour, at 100 °C for 15 minutes, 200 °C for 15 minutes and 400 °C for 15 minutes. Bands in blue are CH<sub>3</sub>I adsorbed on NaCl and green are gaseous CH<sub>3</sub>I.

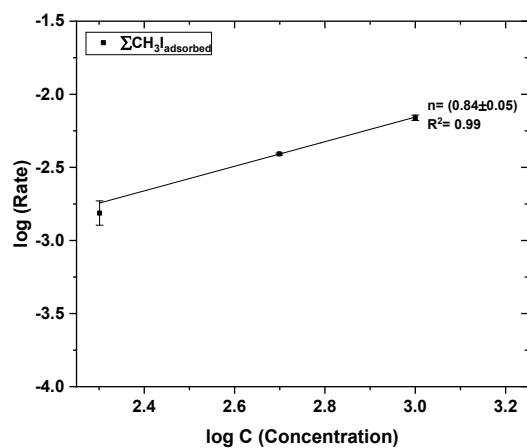

**Figure S5:** Double log curve of rate of  $\Sigma\text{CH}_3\text{I}_{\text{adsorbed}}$  versus  $\text{CH}_3\text{I}$  gaseous concentration at 1000, 500 and 200 ppm (experiment series (4)).

**Reference:**

<sup>1</sup> S. Sobanska, H. Houjeij, S. Coussan, C. Aupetit, S. Taamalli, F. Louis, L. Cantrel, A. C. Gregoire and J. Mascetti, Infrared matrix-isolation and theoretical studies of interactions between  $\text{CH}_3\text{I}$  and water, *J. Mol. Struct.*, 2021, **1236**, 130342. DOI: 10.1016/j.molstruc.2021.130
